# Supplementary material
Source: PubMed Central journal article supplement (PMC7848980)
Supplement: AAC.00685-20-s0001.pdf [file AAC.00685-20-s0001.pdf]

Table S1. Demographic and clinical data for secondary and subsequent *B. pseudomallei* isolates.

| Individuals             |                                          |                  |
|-------------------------|------------------------------------------|------------------|
|                         | <i>n</i> patients                        | 11               |
|                         | <i>n</i> individuals with co-morbidities | 11               |
|                         | Age range                                | 16-74 years      |
|                         | Gender                                   | 54.5% F, 45.5% M |
| Isolate collection site |                                          |                  |
|                         | Lung                                     | 6                |
|                         | Blood                                    | 3                |
|                         | Skin and soft tissue                     | 2                |
|                         | Bone/joint                               | 1                |
|                         | Urine                                    | 1                |
| Isolate total           |                                          |                  |
|                         | <i>n</i>                                 | 13               |

Table S2. Cefiderocol *in vitro* minimum inhibitory concentrations (mg/L) and disc diffusion range (mm) for clinical *B. pseudomallei* isolates collected from individuals over time. Subsequent isolates are shaded green, red or yellow to show a decrease, increase or no change in MIC from the original isolate, respectively.

| Original Isolate | CEF MIC             | Disc Zone | Date Collected | Subsequent Isolate/s | CEF MIC             | Disc Zone | Date Collected |
|------------------|---------------------|-----------|----------------|----------------------|---------------------|-----------|----------------|
| C4               | 8                   | 14        | 2006           | C5                   | 8                   | 20        | 2009           |
|                  |                     |           |                | C6                   | 8                   | 18        | 2012           |
|                  |                     |           |                | C7                   | 8                   | 19        | 2014           |
| T63              | 0.125               | 38        | 1996           | C15                  | 8                   | 18        | 2010           |
| C50              | 4                   | 29        | 2000           | C52                  | 4                   | 30        | 2000           |
| C28              | ≤0.03               | 39        | 2012           | C29                  | 0.06                | 37        | 2017           |
| T64              | ≤0.03               | 40        | 1999           | T118                 | 0.125               | 43        | 2002           |
| C18              | 0.125               | 40        | 2011           | C20                  | 0.06                | 42        | 2011           |
| C87              | ≤0.03               | 40        | 2014           | C88                  | ≤0.03               | 41        | 2014           |
| C37              | 0.125               | 39        | 2015           | C38                  | 0.06                | 41        | 2016           |
| C174             | 0.06                | 42        | 2017           | C175                 | ≤0.03               | 40        | 2017           |
| C106             | ≤0.03               | 41        | 2015           | C107                 | ≤0.03               | 41        | 2015           |
| T19              | ≤0.03               | 37        | 1997           | T43                  | 0.5                 | 43        | 1999           |
| <i>n</i> = 11    | MIC <sub>90</sub> 4 | 14-41     | 1996-2017      | <i>n</i> = 13        | MIC <sub>90</sub> 8 | 18-43     | 1999-2017      |
